# Supplementary material for: NMR Investigation of the Supramolecular Complex Formed by a Phenylboronic Acid-Ferrocene Electroactive Probe and Native or Derivatized β-Cyclodextrin
Source: MDPI journal article supplement (doi:10.3390/ijms23116045), 2022-05-27
Supplement: s1 [file s1]

# NMR investigation of the supramolecular complex formed by a phenylboronic acid-ferrocene electroactive probe and native or derivatized $\beta$ -cyclodextrin

Andrea Cesari <sup>1+\*</sup>, Maria Antonietta Casulli <sup>2+\*</sup>, Takeshi Hashimoto <sup>2</sup>, Takashi Hayashita <sup>2</sup>

<sup>1</sup> Department of Chemical Sciences, University of Padova; andrea.cesari@unipd.it

<sup>2</sup> Department of Materials and Life Sciences, Sophia University; m-casulli-5h6@sophia.ac.jp

\* Correspondence: andrea.cesari@unipd.it (A. Cesari); m-casulli-5h6@sophia.ac.jp (M.A. Casulli)

+ These authors equally contributed to the work.

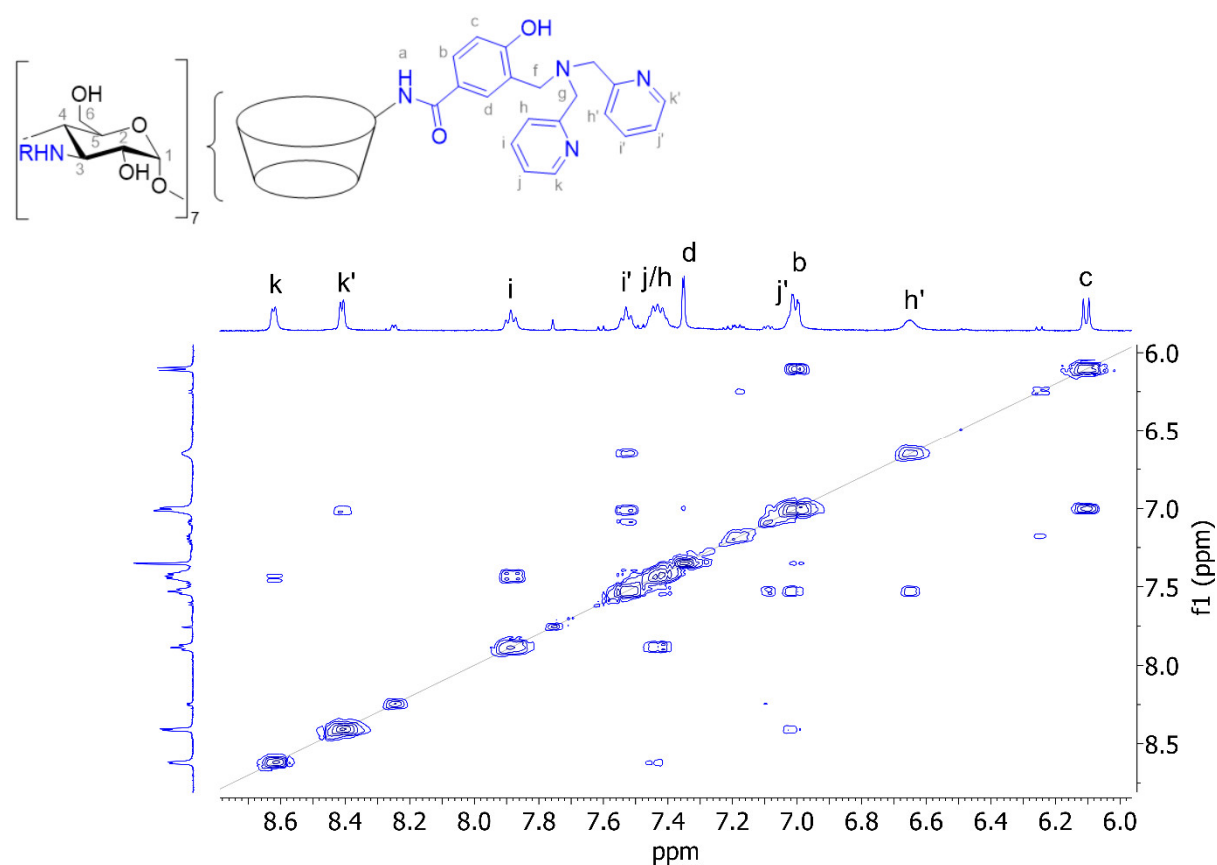

Figure S1. 2D COSY map (500 MHz, 25 °C, D<sub>2</sub>O) spectrum of dpa-*p*-HB-β-CD.

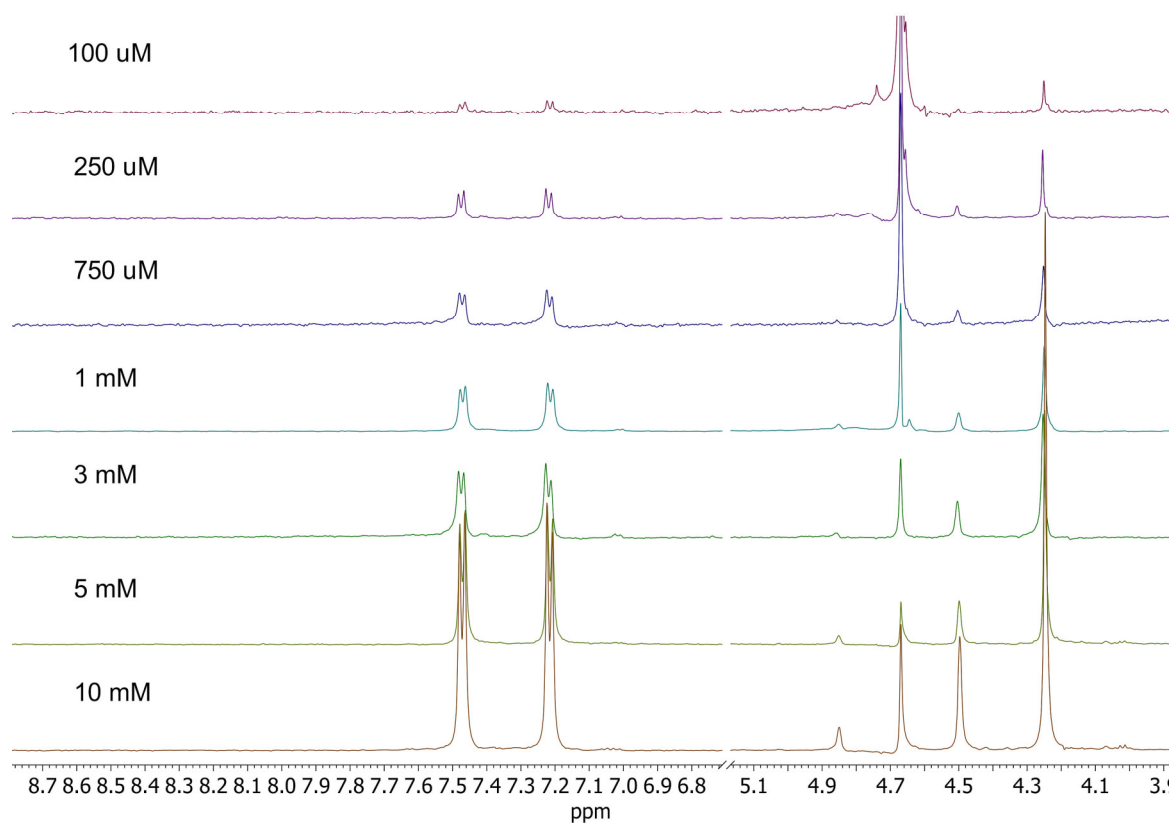

**Figure S2.** <sup>1</sup>H NMR titration (500 MHz, 25 °C, DMSO-d<sub>6</sub>/D<sub>2</sub>O (1:10 v/v), [Na<sub>2</sub>CO<sub>3</sub>] = 10 mM, [4-Fc-PB] probe = 0.1 mM ÷ 10 mM. No proton shifts of 4-Fc-PB have been observed, indicating the absence of any self-inclusion.

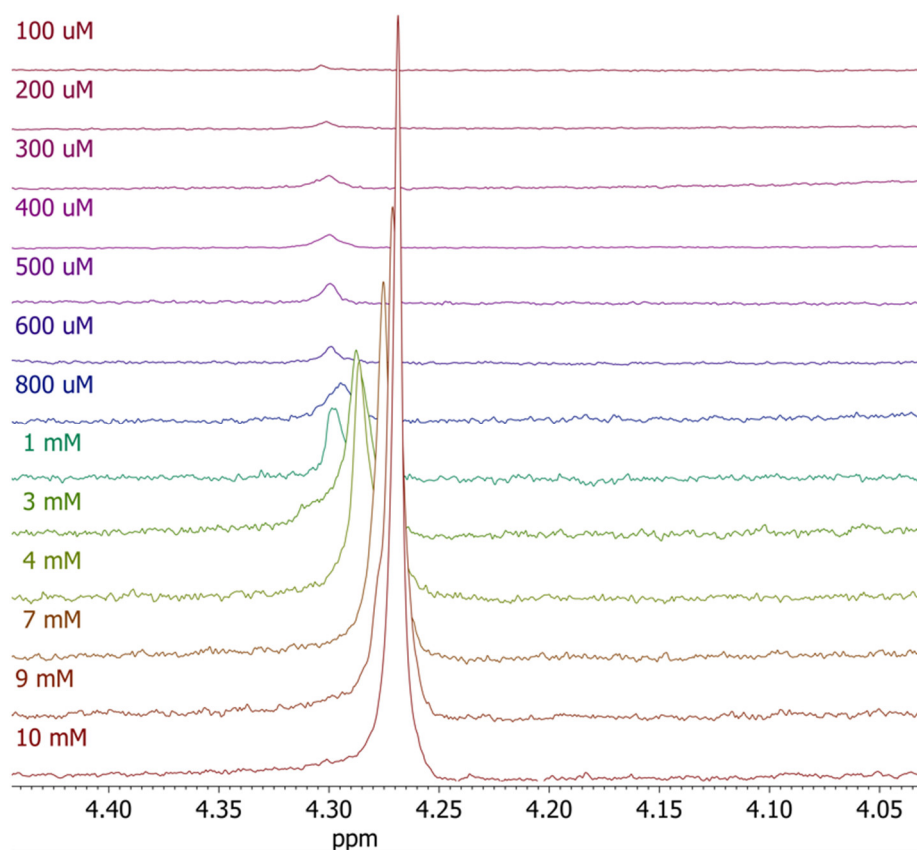

**Figure S3.**  $^1\text{H}$  NMR titration (500 MHz, 25  $^\circ\text{C}$ ,  $\text{DMSO-d}_6/\text{D}_2\text{O}$  (1:10 v/v), of [4-Fc-PB] probe = 0.1mM-10mM,  $[\beta\text{-CDs}] = 5 \text{ mM}$ ,  $[\text{Na}_2\text{CO}_3] = 10 \text{ mM}$ . Proton shift of  $\text{H}_8$  belonging to 4-Fc-PB have been observed indicating an inclusion in  $\beta\text{-CDs}$ .

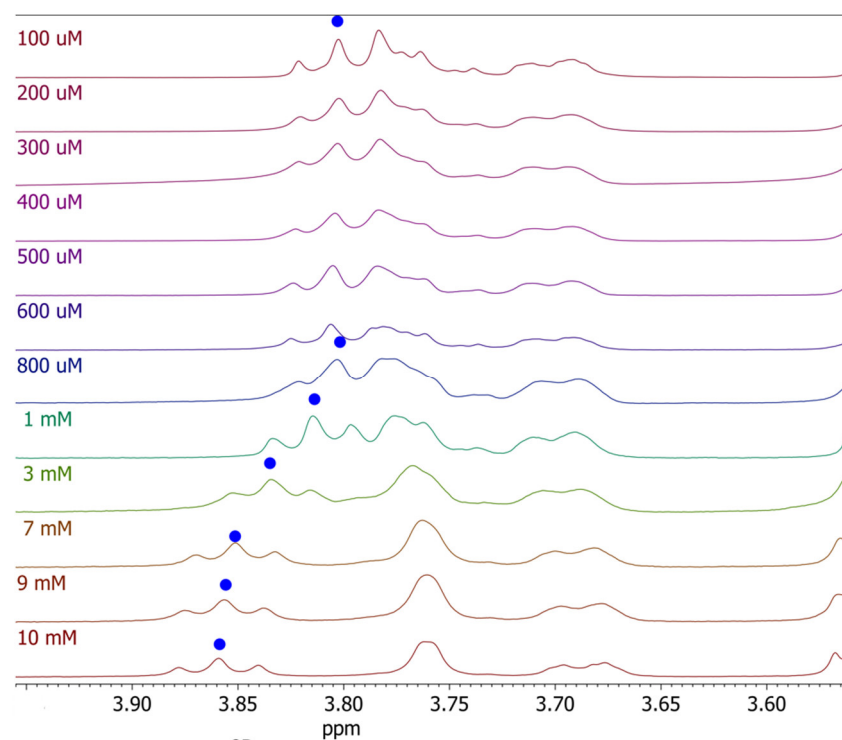

**Figure S4.**  $^1\text{H}$  NMR titration (500 MHz, 25  $^\circ\text{C}$ ,  $\text{DMSO-d}_6/\text{D}_2\text{O}$  (1:10 v/v), of [4-Fc-PB] probe = 0.1mM-10mM,  $[\beta\text{-CDs}] = 5 \text{ mM}$ ,  $[\text{Na}_2\text{CO}_3] = 10 \text{ mM}$ . Proton shift of  $\text{H}_3$  belonging to the internal

cavity of  $\beta$ -CDs have been observed indicating an inclusion of 4-Fc-PB probe in  $\beta$ -CDs.

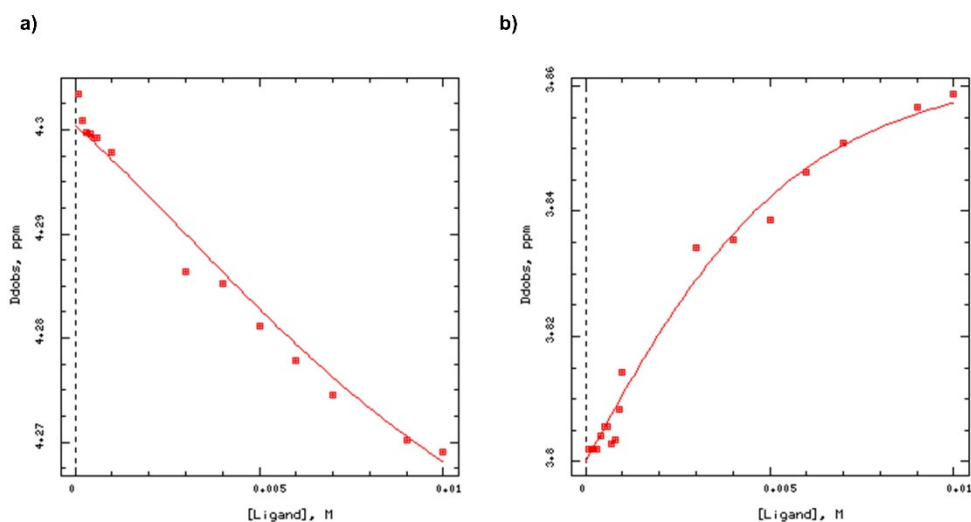

**Figure S5.** Plot of proton chemical shifts from  $^1\text{H}$  NMR spectra,  $[4\text{-Fc-PB}] = 0.1 - 10 \text{ mM}$ ,  $[\beta\text{-CDs}] = 5 \text{ mM}$ , in  $\text{DMSO-}d_6/\text{D}_2\text{O}$  (1:10 v/v),  $[\text{Na}_2\text{CO}_3] = 10 \text{ mM}$ , 500 MHz, 25  $^\circ\text{C}$ . a)  $\text{H}_8$  protons shifts of 4-Fc-PB probe; b)  $\text{H}_3$  protons shifts of natural  $\beta$ -CDs.

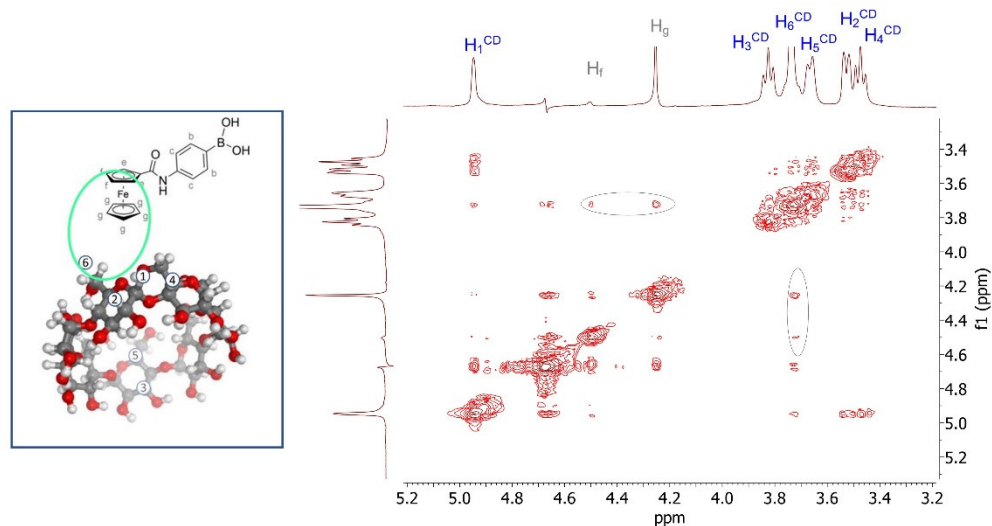

**Figure S6.** 2D ROESY map (500 MHz) of  $[4\text{-Fc-PB}]$  probe = 10 mM and natural  $[\beta\text{-CDs}] = 10 \text{ mM}$ ,  $\text{DMSO-}d_6/\text{D}_2\text{O}$  (1:10 v/v),  $[\text{Na}_2\text{CO}_3] = 10 \text{ mM}$ , mixing time: 0.3 s; scans: 64; spinlock strength: 5.2 KHz.

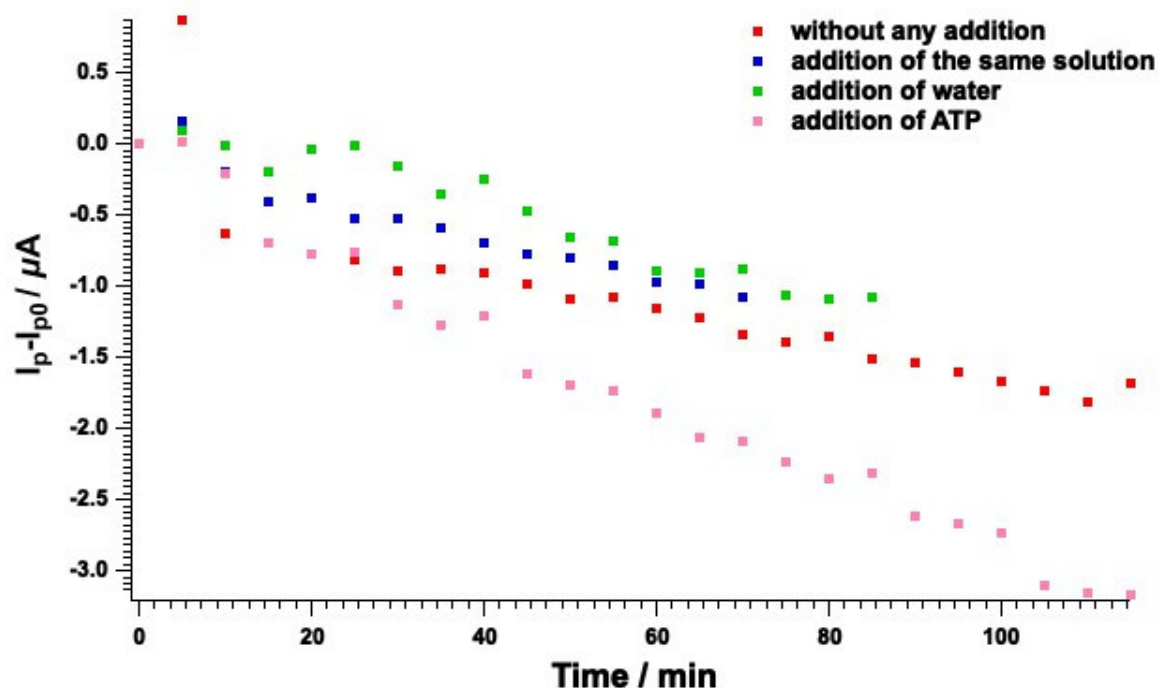

**Figure S7.** Trend in time (4-Fc-PB reduction peaks) by addition ATP (3 measurements for 0M, 200  $\mu$ M, 300  $\mu$ M, 400  $\mu$ M, 500  $\mu$ M, 600  $\mu$ M, 750  $\mu$ M, 1 mM for a total of 24 measurements) compared to three control experiments (addition of water, addition of the same solution of the electrochemical bath, no solution added). Measurements achieved in methanol:  $[\text{NaClO}_4] = 0.2 \text{ M}$  (1:10 in v/v) water solution;  $[\text{CHES buffer}] = 1 \text{ mM}$  (pH adjusted to 9.0 with NaOH).

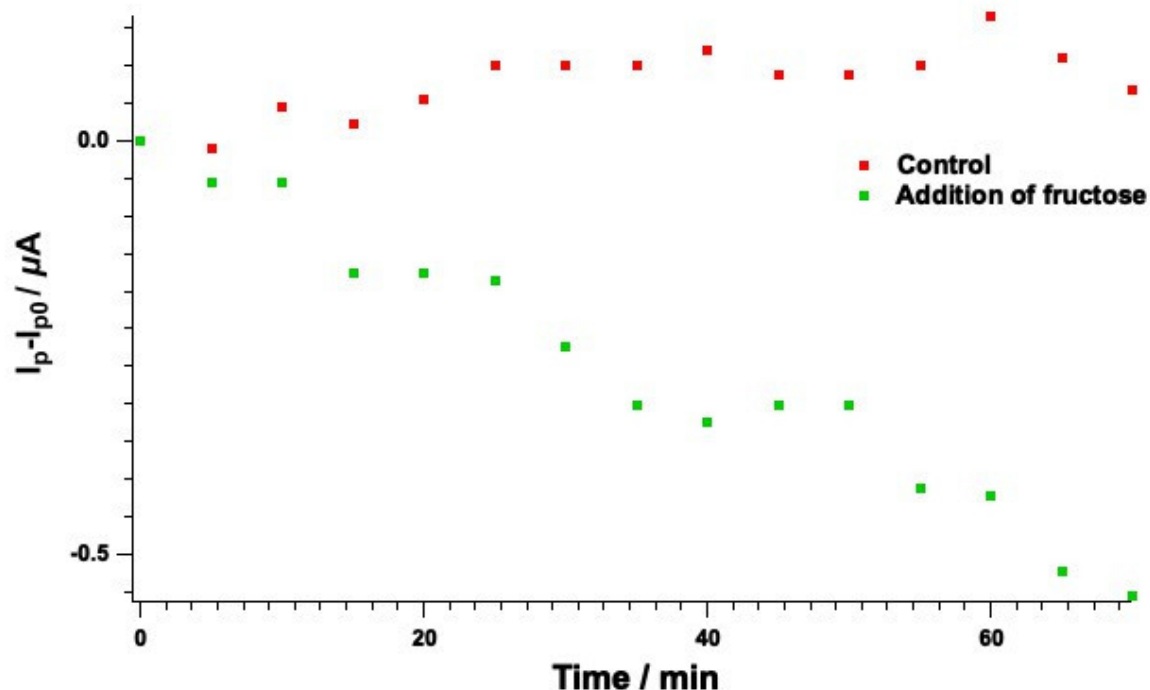

**Figure S8.** Trend in time (4-Fc-PB reduction peaks) by addition of fructose (3 measurements for 0M, 1 mM, 2 mM, 3 mM, 5 mM, for a total of 15 measurements) compared to the control experiment (addition of water). Measurements achieved in methanol:  $[\text{NaClO}_4] = 0.2 \text{ M}$  (1:10 in v/v) water solution;  $[\text{NaH}_2\text{PO}_4 \text{ buffer}] = 1 \text{ mM}$  (pH adjusted to 9.0 with NaOH).

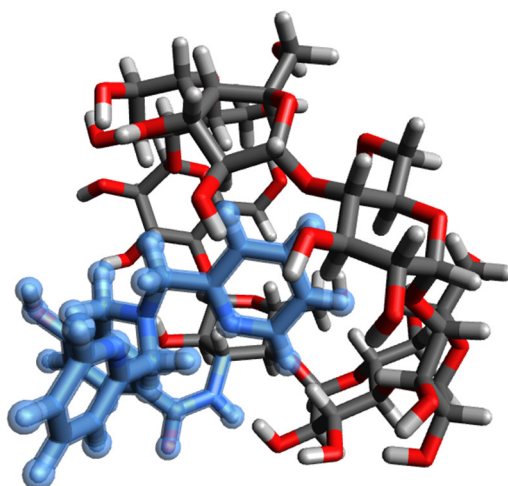

**Figure S9.** 3D representation of dpa-*p*-HB- $\beta$ -CD, with dpa group highlighted in light blue colour.

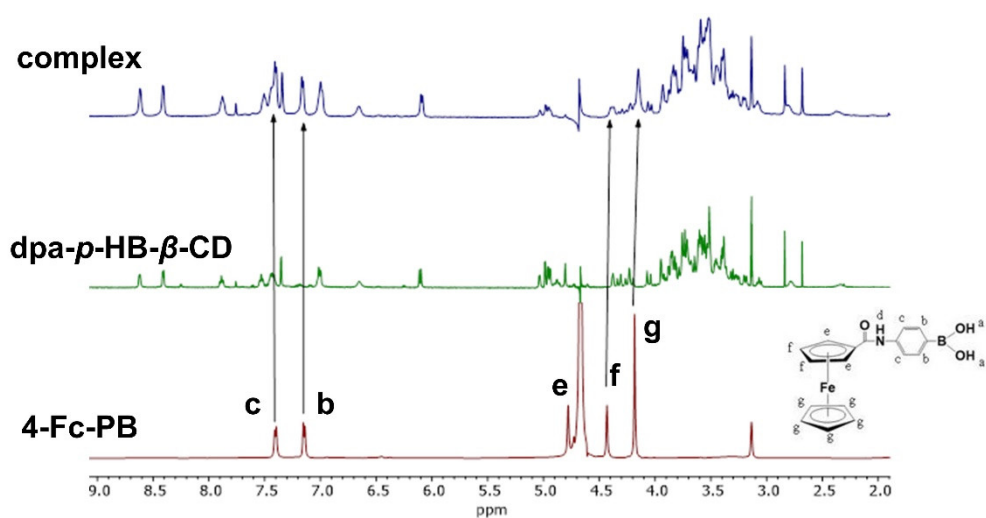

**Figure S10.**  $^1\text{H}$  NMR (500 MHz,  $\text{DMSO-d}_6/\text{D}_2\text{O}$  (1:10 v/v),  $[\text{Na}_2\text{CO}_3] = 10 \text{ mM}$ ) spectrum of pure  $[\text{4-Fc-PB}] = 5 \text{ mM}$  (low), pure  $[\text{dpa-}p\text{-HB-}\beta\text{-CDs}] = 5 \text{ mM}$  (middle) and  $[\text{4-Fc-PB}] = 5 \text{ mM}/[\text{Zn}^{2+}\text{dpa-}p\text{-HB-}\beta\text{-CD}] = 5 \text{ mM}$  supramolecular complex (top).

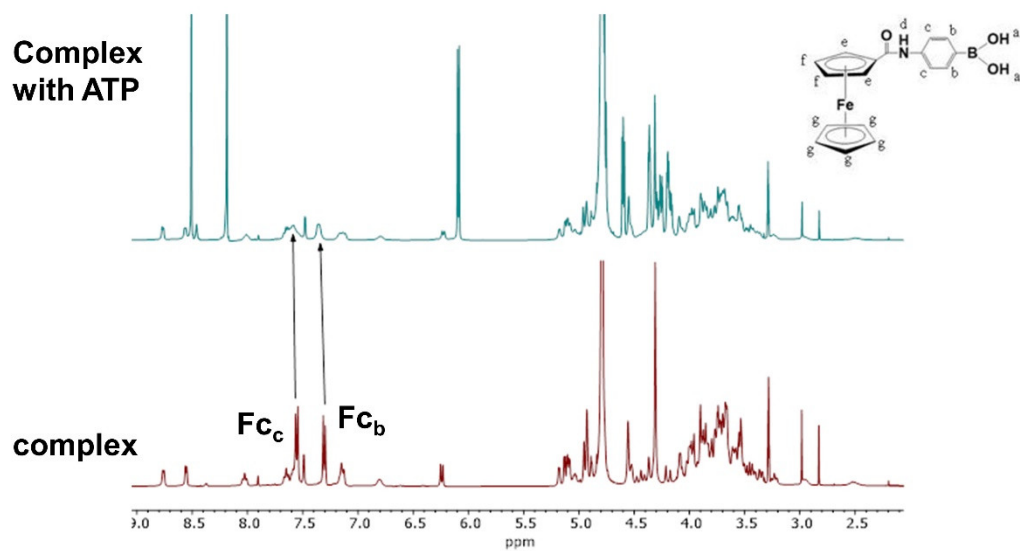

**Figure S11.** <sup>1</sup>H NMR (500 MHz, DMSO-d<sub>6</sub>/D<sub>2</sub>O (1:10 v/v), [Na<sub>2</sub>CO<sub>3</sub>] = 10 mM) spectrum of 4-Fc-PB/dpa-*p*-HB-β-CD supramolecular complex (5:5 mM) (low) and 4-Fc-PB/dpa-*p*-HB-β-CD/ATP (5:5:30 mM) (top).
